# Supplementary material
Source: PubMed Central journal article supplement (PMC3098488)
Supplement: emboj2011117s1.pdf [file emboj2011117s1.pdf]

**Table SI** Yeast strains used in this study

| <b>Strains</b> | <b>Genotype</b>                                                      | <b>Source</b> |
|----------------|----------------------------------------------------------------------|---------------|
| BY4741         | <i>MAT a his3Δ1 leu2Δ0 met15Δ ura3Δ0</i>                             | Invitrogen    |
| BY4742         | <i>MAT α his3Δ1 leu2Δ0 lys2Δ0 ura3Δ0</i>                             | Invitrogen    |
| SC061          | <i>MAT a lsm1::KanMX</i>                                             | Invitrogen    |
| SC062          | <i>MAT α lsm1::KanMX</i>                                             | Invitrogen    |
| SC063          | <i>rad52::KanMX</i>                                                  | Invitrogen    |
| SC064          | <i>yku80::KanMX</i>                                                  | Invitrogen    |
| SC065          | <i>lsm1::KanMX rad52::HIS3</i>                                       | This study    |
| SC066          | <i>lsm1::KanMX yku80::HIS3</i>                                       | This study    |
| SC067          | <i>yku80::KanMX rad52::HIS3</i>                                      | This study    |
| GA2321         | <i>Mat α hml::ADE1 hmr::ADE1 ade3::GALHO MATinc-URA3</i>             | Susan Gasser  |
| GA2368         | <i>Mat α hml::ADE1 hmr::ADE1 ade3::GALHO MATinc-URA3 rad52::LEU2</i> | Susan Gasser  |
| SC070          | <i>Mat α hml::ADE1 hmr::ADE1 ade3::GALHO MATinc-URA3 lsm1::KanMX</i> | This study    |
| SC071          | <i>MAT a his3Δ1 leu2Δ0 met15Δ ura3Δ0 trp1::HIS3</i>                  | This study    |
| SC072          | <i>lsm1::KanMX trp1::HIS3</i>                                        | This study    |
| SC073          | <i>yku80::KanMX trp1::HIS3</i>                                       | This study    |
| SC074          | <i>fob1::KanMX</i>                                                   | Invitrogen    |
| SC075          | <i>mus81::NAT</i>                                                    | S.Moreno      |
| SC076          | <i>mms4::NAT</i>                                                     | S.Moreno      |
| SC077          | <i>lsm1::KanMX mus81::NAT</i>                                        | This study    |
| SC078          | <i>lsm1::KanMX mms4::NAT</i>                                         | This study    |
| SC079          | <i>ski2::HIS3</i>                                                    | This study    |
| SC080          | <i>lsm1::KanMX ski2::HIS3</i>                                        | This study    |
| SC081          | <i>hht2-hhf2::NAT</i>                                                | This study    |
| SC082          | <i>lsm1::KanMX hht2-hhf2::NAT</i>                                    | This study    |
| SC083          | <i>lsm1::KanMX ski2::HIS3 hht2-hhf2::NAT</i>                         | This study    |
| SC084          | <i>lsm1::KanMX hta1-htb1::HYG</i>                                    | This study    |
| SC085          | <i>lsm1::KanMX ski2::HIS3 hta1-htb1::HYG</i>                         | This study    |

**Table SII** Plasmids used in this study

| <b>Plasmids</b>         | <b>Description</b>          | <b>Source</b>                              |
|-------------------------|-----------------------------|--------------------------------------------|
| <i>pWJ1213</i>          | <i>Rad52-YFP</i>            | Felix Prado (Feng et al., 2007)            |
| <i>pMT116</i>           | <i>2μ (TRP1)</i>            | Stanley Fields (Boulton and Jackson, 1996) |
| <i>pRS316-SU</i>        | see experimental procedures | Felix Prado (Prado and Aguilera, 1995)     |
| <i>pARP02</i>           | <i>pYES2</i>                | Alain Verreault                            |
| <i>pARP19 (GAL-H3)</i>  | <i>pGAL-3xHA-Histone H3</i> | Alain Verreault                            |
| <i>pARP23 (GAL-H4)</i>  | <i>pGAL-3xHA-Histone H4</i> | Alain Verreault                            |
| <i>P67(GAL-H2A-H2B)</i> | <i>pGAL-HTA2-HTB2-URA3</i>  | Akash Gunjan (Gunjan and Verreault, 2003)  |

## Materials and Methods

### RNA isolation and Microarray analysis

Total RNA was extracted from yeast using RNeasy Mini Kit (Qiagen, Valencia, CA, USA) according to the manufacturer's instructions. The RNA integrity was assessed using Agilent 2100 Bioanalyzer (Agilent, Palo Alto, CA). Labelling and hybridizations were performed according to protocols from Affymetrix. Briefly, 7  $\mu$ g of total RNA were labeled using the WT Double Stranded cDNA synthesis kit and DNA terminal labelling kit (Affymetrix Inc., Santa Clara, CA, USA), and then hybridized to Yeast Genome 2.0 array (Affymetrix). Washing and scanning were performed using *GeneChip* System of Affymetrix (GeneChip Hybridization Oven 640, GeneChip Fluidics Station 450 and GeneChip Scanner 7G). The robust microarray analysis (RMA) algorithm was used for background correction, intra- and inter-microarray normalization, and expression signal calculation (Bolstad et al., 2003; Irizarry et al., 2003a; Irizarry et al., 2003b). Ratios were calculated by dividing the expression signals corresponding to the *lsm1 $\Delta$*  strain by the expression signals of the wild-type strain (Table S3). Values higher than 1 corresponds to genes upregulated in the *lsm1 $\Delta$*  strain and those lower than 1 represents genes downregulated in the mutant compared to the wild-type strain. The average value of two experiments was used.

## References

- Bolstad, B.M., Irizarry, R.A., Astrand, M. and Speed, T.P. (2003) A comparison of normalization methods for high density oligonucleotide array data based on variance and bias. *Bioinformatics*, **19**, 185-193.
- Boulton SJ. Jackson SP (1996) Identification of a *Saccharomyces cerevisiae* Ku80 homologue: roles in DNA double strand break rejoining and in telomeric maintenance. *Nucleic Acids Res* **24**: 4639-4648.
- Feng Q, During L, de Mayolo AA, Lettier G, Lisby M, Erdeniz N, Mortensen UH, Rothstein R (2007) Rad52 and Rad59 exhibit both overlapping and distinct functions. *DNA Repair (Amst)* **6**: 27-37.
- Gunjan A. Verreault A (2003) A Rad53 kinase-dependent surveillance mechanism that regulates histone protein levels in *S. cerevisiae*. *Cell* **115**: 537-549
- Irizarry, R.A., Bolstad, B.M., Collin, F., Cope, L.M., Hobbs, B. and Speed, T.P. (2003a) Summaries of Affymetrix GeneChip probe level data. *Nucleic Acids Res*, **31**, e15.
- Irizarry, R.A., Hobbs, B., Collin, F., Beazer-Barclay, Y.D., Antonellis, K.J., Scherf, U. and Speed, T.P. (2003b) Exploration, normalization, and summaries of high density oligonucleotide array probe level data. *Biostatistics*, **4**, 249-264.
- Prado F. Aguilera A (1995) Role of reciprocal exchange, one-ended invasion crossover and single-strand annealing on inverted and direct repeat recombination in yeast: different requirements for the *RAD1*, *RAD10*, and *RAD52* genes. *Genetics* **139**: 109-12.

**A**

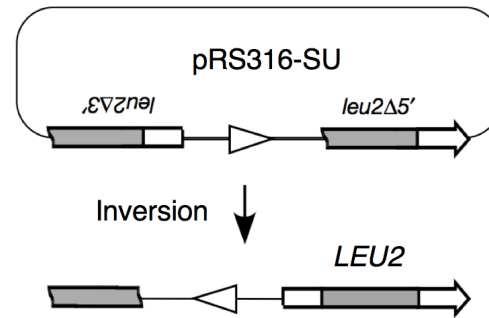

**B**

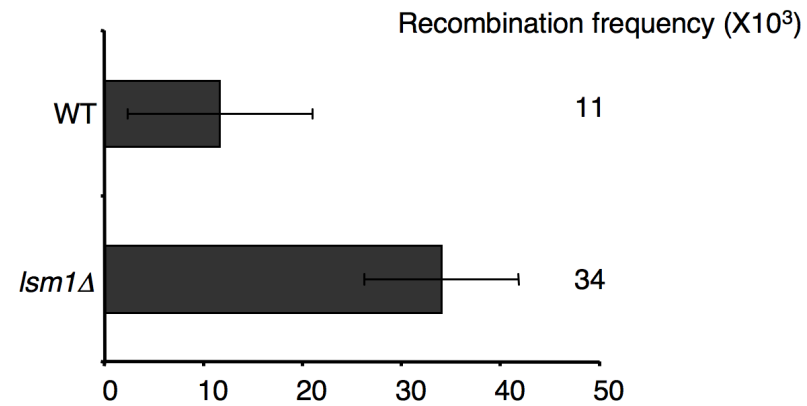

**Figure S1** Frequency of homologous recombination. (A) Plasmid pRS316-SU carrying the inverted repeat system SU and its recombination product. (B) Frequency of Leu<sup>+</sup> recombinants in wild-type and *lsm1Δ* cells.
